# Supplementary material for: The Nubian spectrum: 3D geometric morphometric perspectives on Levallois core reduction at Tweefontein, South Africa
Source: Research Square preprint supplement (doi:10.21203/rs.3.rs-6605250/v1), 2025-05-15
Supplement: Supplementary file 2 [file e14d7a10ccbe2520cb139725.docx]

**The Nubian spectrum: 3D geometric morphometric perspectives on Levallois core reduction at Tweefontein, South Africa**

***SI2. Supplementary Tables S1-S14 and Figures S1-S2***

**Table S1. Definitions of Levallois/radial cores in the southern African literature (ordered chronologically by publication year).**

| **Reference** | **Study site / region** | **Core type** | **Definition** |
| --- | --- | --- | --- |
| Sampson, 1968: 13 | Orange River / Karoo | Levallois cores | (a) A flat triangular core carefully prepared, with a facetted platform at the base of the triangle. Both surfaces are covered with preparation scars, and on one surface these are truncated by an elongated convergent scar, following the outline of the core margin. Some specimens have more than one such scar on the same face, (b) As in (a) but the large scar formed by the removal of the final flake is not convergent and does not follow the outline of the core margin. Instead this scar is subcircular or irregular in outline, (c) A flat sub-circular or irregular-outlined core with a facetted platform on one part of the margin. Both faces of the core are covered by preparation scars. The scars on one face are truncated by a single large scar caused by the removal of a large flake struck from the facetted platform. The outline of this scar follows that of the core margin. |
| Sampson, 1968: 13 | Orange River / Karoo | Discoid cores | A flat circular prepared core with facetting around the entire margin. Flakes have been removed from one surface by repeated striking at different points around the facetted margin. Some specimens have an irregular outline and these are not circular in plan. |
| Beaumont, 1978: 33 | Border Cave | Radial prepared | Forms show preparation along part or all of the nucleus periphery and a subsequent suite of removals over one face from the platform so provided. The following subclasses can be isolated on the basis of form and scar intersection pattern: (a) Discoidal. Irregular arrises and sub-circular plan-forms are characteristic. (b) Blade. Parallel arrises and crudely quadrilateral plan-forms are characteristic.  (c) Triangular. Convergent arrises and crudely triangular plan-forms are characteristic. |
| Volman, 1981: 20 | Southern Cape | Core prepared for one major removal | The few cores which appear definitely to have been set-up for the production of a single flake are placed in this category. Pieces included here would commonly be called "Levallois" flake or blade cores by other researchers. My impression of other sub-Saharan core classifications is that most researchers have a rather loose definition of what constitutes a "Levallois" core and some of the cores which I have classified in other categories (especially radial cores) may be considered "Levallois" by other workers. |
| Volman, 1981: 21 | Southern Cape | Radial core (sub-type of intersecting ridge core) | Core with flake removals directed from the circumference towards the center of one surface or towards the centers of two opposed surfaces. Section is generally plano-convex, sometimes tending towards biconical. This category includes pieces commonly called "Mousterian disc cores." |
| Singer & Wymer, 1982: 47 | Klasies River | Discoidal | A few rare cores show radial flaking on both faces and a distinct intention of making a continuous or near-continuous straight edge. It seems likely that they are tools or weapons of some sort and not just residual pieces from flake manufacture. |
| Singer & Wymer, 1982: 47 | Klasies River | Tortoise | Tortoise cores, in the sense used to describe these characteristic cores of Levalloisian industries in the Northern Hemisphere, are extremely rare at KRM, as at other South African sites. |
| Singer & Wymer, 1982: 46 | Klasies River | Convergently-flaked single platform core (specialised tortoise core, Levallois) | The type of core designed for making flake-blades is no more than a specialized form of tortoise core: instead of the core being prepared by radial flaking, two or more large flakes are struck from each side of the striking platform so that a central ridge is formed. The upper part of this ridge is removed by a small flake struck from immediately behind it. After a final preparation of the striking platform, another flake is removed from behind this one and, if the force of the blow has been judged correctly, the result will be a pointed flake-blade. Most cores of this form appear to have been made just for the one pointed flake-blade, but, depending on the size of the remaining core, yet another can be struck from it, or even more. Each one would be successively larger, and there would be a corresponding decrease in the chance of getting one with the central ridge running clean to the point, an essential feature for strength if intended for use as a projectile point. This type of core is described as a convergently flaked single platform core. … This technique for producing pointed flake-blades is, of course, that normally referred to as "Levallois," as is the process of preparing striking platforms. The resulting pointed flake-blade is identical to the "Levallois point" of European terminology (Bordes 1961) |
| Volman, 1984: 194 |  | MSA cores | Two broad categories of cores are represented in most MSA assemblages: cores for the production of flakes with intersecting dorsal scars (mainly radial/discoid and change of orientation cores) and cores for the production of flakes with parallel, sub-parallel or rarely convergent dorsal scars (mainly single and double platform cores, some of which conform to the European concept of Levallois blade cores [see footnote])… Levallois flake cores are very rare in the southern Cape, but occur in higher frequencies in the southern African interior and farther north. |
| Volman, 1984: 219 | Southern Africa | Footnote on Levallois terminology | Unfortunately, the term 'Levallois' has not been used with any consistency in the African archaeological literature. 'Levallois' and 'prepared' core technique often are equated, although the latter concept implies a greater variety of approaches to flake production. Among prepared cores, I would include radial (or discoid) ones, which may be prepared initially like Levallois flake cores, but from which many flakes are detached. These cores are common in many African ESA and MSA assemblages. Bordes (1961) notes that Levallois flake cores are often further worked as radial ones. In some southern African ESA and MSA assemblages, the last removal from a radial core may give it the appearance of a Levallois flake core.  Other core types that are 'prepared' but not 'Levallois' include the prismatic blade cores of the European Upper Paleolithic, which grade into Levallois blade cores (Bordes 1980). Prepared blade and flake-blade cores with a single straight or curved platform occur in the South African interior during the ESA. Similar cores, plus prepared cores with opposed platforms in the same or parallel planes, are widespread in southern Africa during the MSA. |
| Conard et al., 2004: 15-16 | Southern Africa | Parallel (i.e. Levallois) | Parallel cores have two surfaces whose main removal surface must include one or more major removals parallel to the plane that intersects the two surfaces. The main removal surface is on a broad surface of the core and usually includes three or more removals. These cores are usually asymmetrical in cross-section with a slightly convex main removal surface and a more inclined ‘underside.’ All significant removals originate from the intersection of the two surfaces. While preparation of the ‘underside’ of the core is common, it is not necessary. The ‘underside’ may even be fully cortical. The core does not need to be worked along its entire perimeter. Levallois cores fall within this taxonomic group. Levallois cores that have been fully prepared, but from which the main removal(s) have not been struck (Vollkerne), are included. |
| Conard et al., 2004: 15 | Southern Africa | Inclined (i.e. discoid) | Inclined cores have two surfaces with removals Inclined relative to the plane defined by the intersection of the surfaces. Either or both surfaces may be used for the main removals. The removals have an angle of roughly 45° relative to the plane of intersection. All significant removals originate from the intersection of the two surfaces. These cores are often knapped along much of the circumference, and removals usually converge toward the middle of the removal surface. These cores may be conical or biconical but do not need to be bifacial or worked along the entire perimeter. Discoid cores (sensu Boëda, 1995a) fall within this group. |
| Mackay, 2006: 185 | Western Cape | Radial / disc | Centripetally flaked from a single continuous perimeter which separates the core into two hemispheres |
| Mackay, 2009: 358 | Western Cape | Radial | A core with two distinct hemispheres of sub-equal volume separated by a single continuous perimeter. All flake scars directed on to either hemisphere derive from this edge. |
| Mackay, 2009: 357 | Western Cape | Levallois | A core with two distinct hemispheres of sub-equal volume separated by a single continuous perimeter. All flake scars directed on to either hemisphere derive from this edge. The defining feature of a levallois as opposed to a radial core is the presence of one or more scars extending for more than half of the length of the longest axis of the core. These scars were usually produced late in the reduction of the core. |
| Wilkins, 2013: 122 | Kathu Pan 1 | Preferential Levallois | Bifacial hierarchical cores with straight plane of intersection between two surfaces, scar of single “predetermined” large removal taken parallel to plane of intersection |
| Wilkins, 2013: 122 | Kathu Pan 1 | Recurrent Levallois | Bifacial hierarchical cores with straight plane of intersection between two surfaces, multiple “predetermined” scars taken parallel to plane of intersection |
| Wilkins, 2013: 122 | Kathu Pan 1 | Bifacial centripetal | Radial core with removals from both surfaces, removals not parallel to the plane of intersection, non-hierarchical organization of the surfaces |
| Wilkins, 2013: 122 | Kathu Pan 1 | Blade | Bifacial hierarchical cores with domed upper surface, intersection of surfaces is not a plane, elongated removals on exploitation surface, bidirectional exploitation |

**Table S2. PCA eigenvalues of all prepared core surface shapes for principal components accounting for 80% of the variability.**

| **PC** | **Eigenvalue** | **% Variation** | **Cumulative %** |
| --- | --- | --- | --- |
| 1 | 0.0062 | 25.7 | 25.7 |
| 2 | 0.0023 | 9.5 | 35.2 |
| 3 | 0.0023 | 9.4 | 44.6 |
| 4 | 0.0018 | 7.4 | 52.0 |
| 5 | 0.0017 | 7.0 | 59.0 |
| 6 | 0.0011 | 4.7 | 63.7 |
| 7 | 0.0010 | 4.2 | 67.9 |
| 8 | 0.0008 | 3.4 | 71.3 |
| 9 | 0.0008 | 3.2 | 74.5 |
| 10 | 0.0006 | 2.5 | 77.0 |
| 11 | 0.0005 | 2.1 | 79.1 |
| 12 | 0.0004 | 1.6 | 80.8 |

**Table S3. ANOVA results on prepared core shape for significant variables for PCs 1-6.**
Type III sums of squares method. DF = degrees of freedom, SS = sums of squares, F = Goodall’s F-statistic, P = significance levels: P < 0.001 (***), P < 0.01 (**), P < 0.05 (*)

| **PC1 (25.7%)** | **DF** | **SS** | **Residuals** | **F** | **P** |
| --- | --- | --- | --- | --- | --- |
| Technology | 3, 175 | 0.133 | 0.975 | 7.942 | 0.000 *** |
| Type | 7, 171 | 0.161 | 0.947 | 4.157 | 0.000 *** |
| Preparation | 10, 168 | 0.200 | 0.907 | 3.718 | 0.000 *** |
| Raw material | 5, 173 | 0.068 | 1.040 | 2.260 | 0.051 . |
| **PC3 (9.4%)** |  |  |  |  |  |
| Technology | 3, 175 | 0.072 | 0.332 | 12.700 | 0.000 *** |
| Type | 7, 171 | 0.092 | 0.313 | 7.140 | 0.000 *** |
| Preparation | 10, 168 | 0.076 | 0.329 | 3.873 | 0.000 *** |
| Raw material | 4, 173 | 0.025 | 0.380 | 2.274 | 0.049 . |
| **PC4 (7.4%)** |  |  |  |  |  |
| Raw material | 5, 173 | 0.042 | 0.275 | 5.284 | 0.000 *** |

**Table S4. Tukey HSD post-hoc test results on significant pairwise comparisons for prepared core shape on PCs 1-6 (after ANOVA in Table S3).**Tukey multiple comparisons of means, 95% family-wise confidence level. P = significance levels: P < 0.001 (***), P < 0.01 (**), P < 0.05 (*), adjusted for multiple comparisons

| **Variable / PC** | **Pairwise comparison** | **Mean difference** | **P** |
| --- | --- | --- | --- |
| **Technology** |  |  |  |
| PC1 | Prepared – Nubian | 0.063 | 0.004 * |
| PC1 | Radial – Nubian | 0.080 | 0.000 *** |
| PC1 | Radial – Preferential | 0.061 | 0.019 . |
| PC3 | Prepared – Nubian | -0.042 | 0.001 ** |
| PC3 | Radial – Nubian | -0.063 | 0.000 *** |
| PC3 | Radial – Preferential | -0.047 | 0.001 ** |
| **Type** |  |  |  |
| PC1 | Radial – Nubian-s.l. | 0.071 | 0.020 . |
| PC1 | Prepared-uni. – Nubian-s.s. | 0.120 | 0.050 . |
| PC1 | Radial – Nubian-s.s. | 0.091 | 0.001 ** |
| PC3 | Prepared-opp. – Nubian-s.l. | -0.050 | 0.014 * |
| PC3 | Radial – Nubian-s.l. | -0.053 | 0.001 ** |
| PC3 | Prepared-opp. – Nubian-s.s. | -0.071 | 0.000 *** |
| PC3 | Radial – Nubian-s.s. | -0.074 | 0.000 *** |
| PC3 | Radial – Preferential | -0.047 | 0.002 * |
| **Preparation** |  |  |  |
| PC1 | Centripetal – Bilateral | 0.065 | 0.009 * |
| PC1 | Centripetal – Distal-lateral-R | -0.087 | 0.002 ** |
| PC3 | Bidirectional – Distal-lateral-R | 0.058 | 0.013 . |
| PC3 | Centripetal – Bilateral | -0.034 | 0.046 . |
| PC3 | Centripetal – Distal-bilateral | 0.041 | 0.007 * |
| PC3 | Centripetal – Distal-lateral-L | 0.051 | 0.018 . |
| PC3 | Centripetal – Distal-lateral-R | 0.057 | 0.001 ** |
| **Raw material** |  |  |  |
| PC1 | Hornfels – Quartzite | 0.056 | 0.040 . |
| PC4 | Hornfels – CCS | -0.033 | 0.048 . |
| PC4 | Hornfels – Silcrete | 0.035 | 0.005 * |
| PC4 | Dolerite – Silcrete | 0.049 | 0.022 . |

**Table S5. ANOVA results on LD1-2 for prepared cores.**
Type III sums of squares method. DF = degrees of freedom, SS = sums of squares, F = Goodall’s F-statistic, P = significance levels: P < 0.001 (***), P < 0.01 (**)

| **LD** | **DF** | **SS** | **F** | **P** |
| --- | --- | --- | --- | --- |
| LD1 | 4, 164 | 87.24 | 21.81 | 0.000 *** |
| LD2 | 4, 164 | 14.41 | 3.603 | 0.008 ** |

**Table S6. Tukey HSD post-hoc test results on LD1-2 for significant pairwise comparisons for prepared core type (after ANOVA in Table S5).**Tukey multiple comparisons of means, 95% family-wise confidence level. P = significance levels: P < 0.001 (***), P < 0.01 (**), P < 0.05 (*), adjusted for multiple comparisons

| **Variable / LD** | **Pairwise comparison** | **Mean difference** | **P** |
| --- | --- | --- | --- |
| **Type** |  |  |  |
| LD1 | Prepared-opp. – Nubian-s.l. | -1.482 | 0.000 *** |
| LD1 | Radial – Nubian-s.l. | -1.904 | 0.000 *** |
| LD1 | Preferential – Nubian-s.s. | -0.744 | 0.005 ** |
| LD1 | Prepared-opp. – Nubian-s.s. | -1.990 | 0.000 *** |
| LD1 | Radial – Nubian-s.s. | -2.411 | 0.000 *** |
| LD1 | Prepared-opp. – Preferential | -0.339 | 0.002 ** |
| LD1 | Radial – Preferential | -1.245 | 0.000 *** |
| LD2 | Prepared-opp. – Nubian-s.s. | -0.961 | 0.045 * |
| LD2 | Prepared-opp. – Radial | 1.379 | 0.004 ** |

**Table S7. Reduction intensity categories determined by k-means clustering.**

| **Reduction intensity** | **N specimens** | **SDI (lower limit)** | **SDI (upper limit)** |
| --- | --- | --- | --- |
| High | 21 | 0.36 | 0.69 |
| Moderate | 68 | 0.21 | 0.36 |
| Low | 90 | 0.06 | 0.21 |

**Table S8. Reduction intensity frequencies by core type, raw material and preparation pattern.**

| **Core type** | **High (n)** | **High (%)** | **Mod. (n)** | **Mod. (%)** | **Low (n)** | **Low (%)** |
| --- | --- | --- | --- | --- | --- | --- |
| Nubian-s.s. | 3 | 8.1 | 10 | 27.0 | 24 | 64.9 |
| Nubian-s.l. | 4 | 8.9 | 14 | 31.3 | 27 | 60.0 |
| Preferential | 10 | 16.9 | 25 | 42.4 | 24 | 40.7 |
| Prepared-opposed | 1 | 9.1 | 4 | 36.4 | 6 | 54.5 |
| Radial | 2 | 11.8 | 9 | 52.9 | 6 | 35.3 |
| **Raw material** |  |  |  |  |  |  |
| Hornfels | 11 | 10.1 | 39 | 35.8 | 59 | 54.1 |
| Quartzite | 1 | 5.0 | 7 | 35.0 | 12 | 60.0 |
| Silcrete | 4 | 20.0 | 8 | 40.0 | 8 | 40.0 |
| CCS | 2 | 14.3 | 9 | 64.3 | 3 | 21.4 |
| Dolerite | 2 | 20.0 | 4 | 40.0 | 4 | 40.0 |
| Other | 1 | 16.7 | 1 | 16.7 | 4 | 66.7 |
| **Preparation*** |  |  |  |  |  |  |
| Distal | 0 | 0.0 | 1 | 14.3 | 6 | 85.7 |
| Distal-lateral-L | 1 | 7.1 | 5 | 35.7 | 8 | 57.1 |
| Distal-lateral-R | 0 | 0.0 | 5 | 26.3 | 14 | 73.7 |
| Distal-bilateral | 4 | 11.1 | 11 | 30.6 | 21 | 58.3 |
| Centripetal | 1 | 8.3 | 5 | 51.7 | 6 | 50.0 |
| Bilateral | 11 | 26.2 | 17 | 40.5 | 14 | 33.3 |

*For Nubian-s.s., Nubian-s.l. and preferential only

**Table S9. ANOVA results for regressions of core shapes on the natural logarithms of centroid sizes (LnCS) with interaction of core type and reduction intensity (SDI).**
ANOVA performed using nonparametric methods with residual randomisation in permutation procedures (RRPP) based on 1000 permutations. Type I, Ordinary Least Squares estimation method. Effect sizes (Z) are based on F-distributions. DF = degrees of freedom, SS = sums of squares, MS = mean squares, R2 = coefficient of determination, F = Goodall’s F-statistic, Z = effect size, P = significance levels: P < 0.001 (***), P < 0.1 (.)

| **Model** | **DF** | **SS** | **MS** | **R2** | **F** | **Z** | **P** |
| --- | --- | --- | --- | --- | --- | --- | --- |
| **All Levallois cores** |  |  |  |  |  |  |  |
| LnCS | 1 | 0.069 | 0.069 | 0.021 | 3.052 | 2.809 | 0.001 *** |
| Residuals | 140 | 3.132 | 0.023 | 0.979 |  |  |  |
| **LnCS * Core type** |  |  |  |  |  |  |  |
| LnCS | 1 | 0.069 | 0.069 | 0.021 | 3.070 | 2.818 | 0.001 *** |
| Core type | 2 | 0.053 | 0.027 | 0.017 | 1.192 | 0.717 | 0.225 |
| LnCS : Core type | 2 | 0.055 | 0.028 | 0.017 | 1.229 | 0.819 | 0.202 |
| Residuals | 135 | 3.024 | 0.022 | 0.945 |  |  |  |
| **LnCS * SDI** |  |  |  |  |  |  |  |
| LnCS | 1 | 0.069 | 0.069 | 0.021 | 3.055 | 2.812 | 0.001 *** |
| SDI | 2 | 0.035 | 0.353 | 0.011 | 1.568 | 1.308 | 0.097 . |
| LnCS : SDI | 1 | 0.013 | 0.013 | 0.004 | 0.584 | -1.151 | 0.863 |
| Residuals | 137 | 3.084 | 0.023 | 0.963 |  |  |  |

**Table S10. Kendall’s Tau correlation test between ULVR and SDI for Levallois core types.**

| **Core type** | **Kendall’s Tau** | **P** |
| --- | --- | --- |
| Nubian-s.s. | 0.008 | 0.948 |
| Nubian-s.l. | 0.061 | 0.557 |
| Preferential | 0.031 | 0.729 |

**Table S11. PCA eigenvalues of all preferential (final) scar shapes for principal components accounting for 84% of the variability.**

| **PC** | **Eigenvalue** | **% Variation** | **Cumulative %** |
| --- | --- | --- | --- |
| 1 | 0.0196 | 47.6 | 47.6 |
| 2 | 0.0076 | 18.4 | 65.9 |
| 3 | 0.0056 | 13.6 | 79.5 |
| 4 | 0.0019 | 4.6 | 84.1 |

**Table S12. ANOVA results on preferential (final) scar shape for significant variables for PCs 1-4.**Type III sums of squares method. DF = degrees of freedom, SS = sums of squares, F = Goodall’s F-statistic, P = significance levels: P < 0.001 (***), P < 0.01 (**), P < 0.05 (*)

| **PC1 (47.7%)** | **DF** | **SS** | **Residuals** | **F** | **P** |
| --- | --- | --- | --- | --- | --- |
| Technology | 3, 85 | 0.267 | 1.462 | 5.177 | 0.002 ** |
| Type | 4, 80 | 0.462 | 1.212 | 7.623 | 0.000 *** |
| **PC2 (18.4%)** |  |  |  |  |  |
| Raw material | 5, 83 | 0.092 | 0.576 | 2.667 | 0.028 * |
| **PC4 (4.6%)** |  |  |  |  |  |
| Raw material | 5, 83 | 0.019 | 0.147 | 2.168 | 0.065 . |

**Table S13. Tukey HSD post-hoc test results on significant pairwise comparisons for preferential/final scar shape on PCs 1-4 (after ANOVA in Table S12).**Tukey multiple comparisons of means, 95% family-wise confidence level. P = significance levels: P < 0.001 (***), P < 0.01 (**), P < 0.05 (*), adjusted for multiple comparisons

| **Variable / PC** | **Pairwise comparison** | **Mean difference** | **P** |
| --- | --- | --- | --- |
| **Technology** |  |  |  |
| PC1 | Radial – Nubian | -0.253 | 0.002 ** |
| PC1 | Radial – Preferential | -1.195 | 0.030 * |
| **Type** |  |  |  |
| PC1 | Nubian-s.l. – Nubian-s.s. | -0.165 | 0.004 ** |
| PC1 | Preferential – Nubian-s.s. | -0.100 | 0.013 * |
| PC1 | Radial – Nubian-s.s. | -0.294 | 0.000 *** |
| PC1 | Radial – Preferential | -0.195 | 0.029 * |
| **Raw material** |  |  |  |
| PC2 | Quartzite – Hornfels | 0.082 | 0.034 * |
| PC2 | Quartzite – Silcrete | -0.103 | 0.038 * |

**Table S14. Review of core typologies applied to key MSA sites in South Africa (ordered chronologically by publication year).**

| **Study** | **Site (industry)** | **N cores** | **N core categories** | **Types** |
| --- | --- | --- | --- | --- |
| Wurz, 2002 | Klasies River (MSA) | 796 | 6 | Blade  Irregular  Point  Preform  “Bladelet”  “Microcore” |
| Wadley, 2005 | Sibudu (Final MSA) | 108 | 16 | Minimal  Core-reduced  Bipolar  Levallois  Other prepared  Radial  Adjacent platform  Change of orientation  Single platform  Opposed platform, same side  Opposed platform, opposite side  Opposed platform, same and opp. side  Double platform  Cylinder  Blade  Bifacial |
| Soriano et al., 2007 | Rose Cottage Cave (HP, post-HP) | 57  129 | 5 | Bipolar  Blade  Flake *  Unidirectional blade and flake **Levallois cores are listed separately within the flake cores* |
| Mackay, 2010 | Klein Kliphuis (Layer Dvi: HP, post-HP) | 311 | 6 | Bipolar  Levallois  Other prepared  Platform  Rotated  Radial |
| Clarkson, 2013 | Klasies River (MSA) | 108 | 18 | Discoidal  Double-sided faceted bidirectional  Faceted bidirectional  Faceted bidirectional blade  Faceted bidirectional disc  Faceted discoidal  Faceted double-sided bidirectional  Faceted semi-discoidal  Faceted unidirectional  Faceted unidirectional blade  Faceted unidir. upper/radial underside  Faceted unifacial disc  Levallois (preferential) *(n = 8)*  Levallois point *(n = 4)*  Multiplatform  Semi-discoidal  Single platform  Unifacial disc |
| Will et al., 2014 | Sibudu (post-HP) | 52 | 4 | Bipolar  Inclined  Parallel  Platform |
| Douze et al., 2015 | Blombos (M3: MIS 5) | 50 | 9 | Inclined  Multidirectional  Parallel central  Parallel on flake ventral  Parallel indeterminate  Parallel preferential *(n = 2)*  Parallel unidirectional  Parallel unidirectional convergent *(n = 4)*  Parallel + inclined |
| Wilkins et al., 2017 | Pinnacle Point 5-6 (MIS 5-3) | 204 | 18 | Bi-blade (no lateral preparation)  Bi-blade (with lateral preparation)  Bi-opposed surface blade  Bipolar  Chopper  Exhausted  Minimal/core on flake  Multiplatform  Preferential flake *(n = 3)*  Preferential point *(n = 4)*  Radial bifacial  Radial unifacial  Recurrent centripetal  Single platform pyramidal blade  Uni-blade (no lateral preparation)  Uni-blade (with lateral preparation)  Wedge blade  Flat bladelet |
| Douze et al., 2018 | Klipdrift (HP) | 203 | 9 | Bipolar  Blade/bladelet unidirectional  Blade/bladelet bidirectional  Informal  Levallois recurrent centripetal  Levallois recurrent unidirectional  Levallois preferential *(n = 5)*  Recurrent centripetal  Unidirectional |
| Will & Conard, 2020 | Sibudu (HP) | 135 | 5 | Bipolar  Inclined  Initial/other  Parallel  Platform |
| de la Peña et al., 2022 | Border Cave (post-HP) | 25 | 6 | Bipolar  Inclined  Parallel  Platform  Core on flake  Test core |
| Mackay et al., 2023 | Klipfonteinrand (MSA) | 239 | 6 | Bipolar  Discoidal  Levallois  Single platform  Rotated (multi-platform)  No type |

**Figure S1. Calculation of volumes for upper and lower core hemispheres: (A) Core mesh model split along the best-fitting plane, separating upper (red) and lower (blue) hemispheres. (B) Convex hulls capturing the smallest bounding volume of the upper (red) and lower (blue) hemispheres.**

**
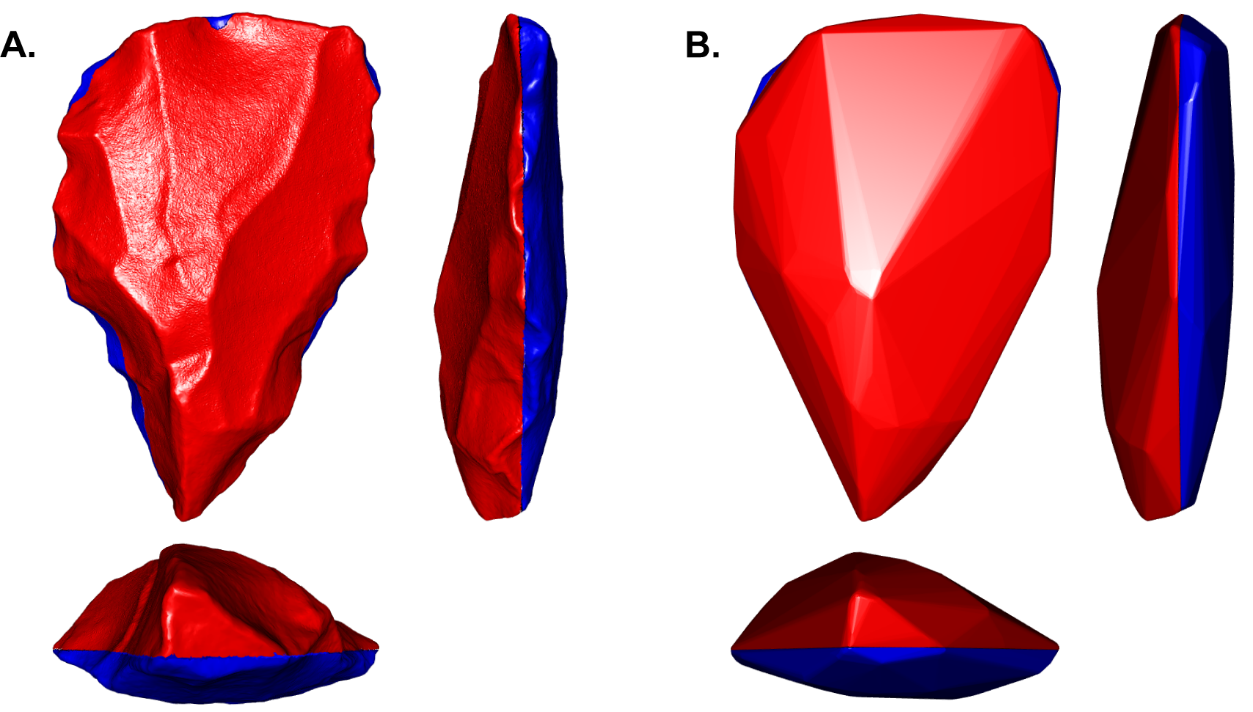
**

**Figure S2. Minimum (blue), maximum (red), and mean (grey) theoretical shapes represented by each Principal Component for PCs 1 to 6, for all prepared cores.**

**
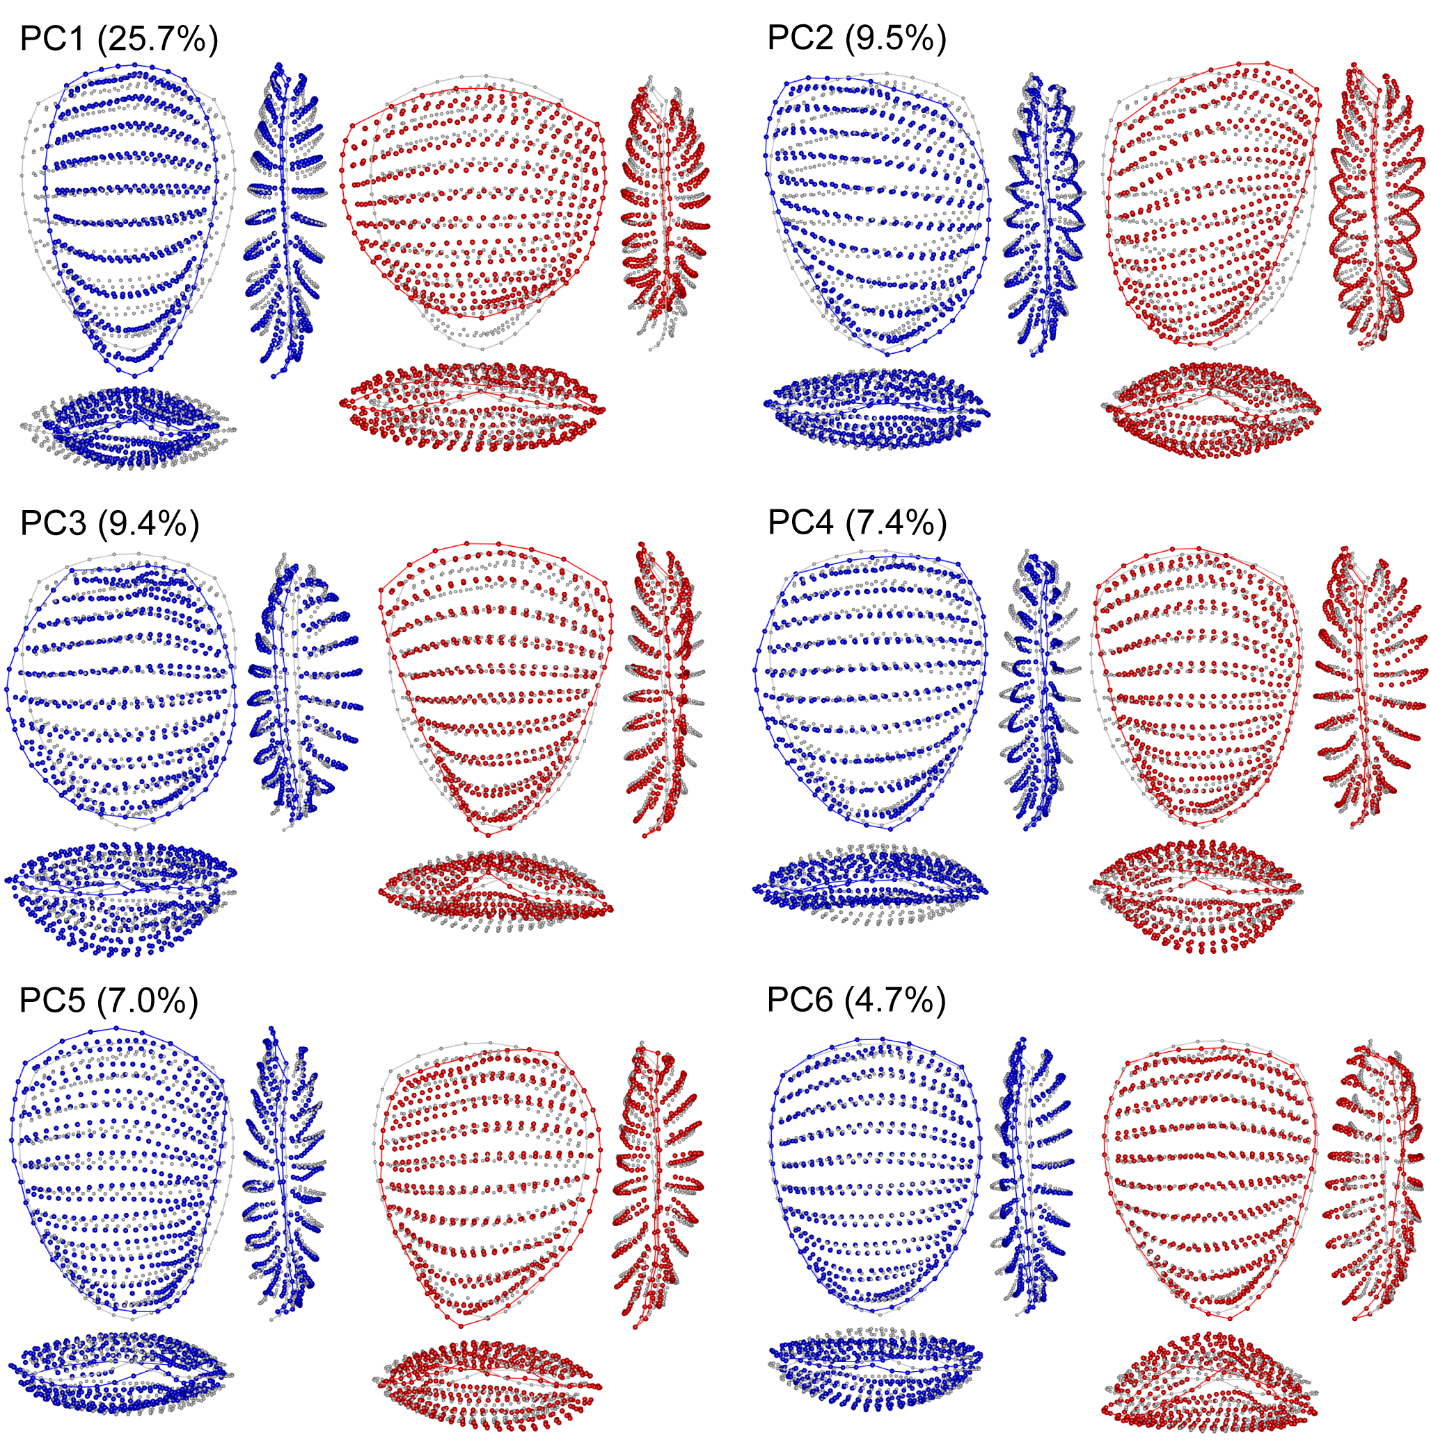
**
